1 Corresponding Author: Kevin Keegan

2 [kevin.keegan@uconn.edu](mailto:kevin.keegan@uconn.edu)

3

4

5

6

7 Towards Resolving and Redefining Amphipyrinae (Lepidoptera, Noctuoidea, Noctuidae): a  
8 Massively Polyphyletic Taxon

9

10

11 Kevin L. Keegan<sup>1</sup>, J. Donald Lafontaine<sup>2</sup>, Niklas Wahlberg<sup>3</sup>, and David L. Wagner<sup>1</sup>

12

13

14

15

16 1. Department of Ecology and Evolutionary Biology, University of Connecticut, Storrs,

17 Connecticut 06269-3043, USA

18

19 2. Canadian National Collection of Insects, Arachnids and Nematodes, Agriculture and Agri-

20 Food Canada, K.W. Neatby Bldg., 960 Carling Ave., Ottawa, ON, Canada K1A 0C6

21

22 3. Department of Biology, Lund University, Sölvegatan 37, 223 62 Lund, Sweden

23

24 **ABSTRACT** Amphipyridae have long been a catchall taxon for Noctuidae, with most members  
25 lacking discernible morphological synapomorphies that would allow their assignment to one of  
26 the many readily diagnosable noctuid subfamilies. Here data from seven gene regions (>5,500  
27 base pairs) for more than 120 noctuid genera are used to infer a phylogeny for Amphipyridae and  
28 related subfamilies. Sequence data for 57 amphipyridine genera—most represented by the type  
29 species of the genus—are examined. Presented here are: the first large-scale molecular  
30 phylogenetic study of Amphipyridae and largest molecular phylogeny of Noctuidae to date;  
31 several proposed nomenclatural changes for well supported results; and the identification of  
32 areas of noctuid phylogeny where greater taxon sampling and/or genomic-scale data are needed.  
33 Adult and larval morphology, along with life history traits, for taxonomic groupings most  
34 relevant to the results are discussed. Amphipyridae are significantly redefined; many former  
35 amphipyridines, excluded as a result of these analyses, are reassigned to other noctuid subfamily-  
36 level taxa. Four genera, *Chamaeclea* Grote, *Heminoctoa* Barnes & Benjamin, *Hemioslaria*  
37 Barnes & Benjamin, and *Thurberiphaga* Dyar are transferred to the tribe Chamaecleini Keegan  
38 & Wagner **New Tribe** in Acontiinae. Stiriina is elevated to Stiriinae **Revised Status**, Grotellina is  
39 elevated to Grotellinae **Revised Status**, and Annaphilina is elevated to Annaphilini **Revised**  
40 **Status**. *Acopa* Harvey is transferred to Bryophilinae, *Aleptina* Dyar is transferred to Condicinae,  
41 *Leucocnemis* Hampson and *Oxycnemis gracillinea* (Grote) are transferred to Oncocnemidinae,  
42 *Nacopa* Barnes & Benjamin is transferred to Noctuinae, and *Nartheophora* Smith is transferred  
43 to Stiriinae. *Azenia* Grote (and its subtribe Azeniina), *Cropia* Walker, *Metaponpneumata*  
44 Möschler, *Sexserrata* Barnes & Benjamin, and *Tristyla* Smith are transferred to Noctuidae  
45 *incertae sedis*. *Hemigrotella* Barnes & McDunnough (formerly in subtribe Grotellina) is retained  
46 in Amphipyridae.

47

48 This published work has been registered in ZooBank,

49 <http://zoobank.org/urn:lsid:zoobank.org:pub:4A140782-31BA-445A-B7BA-6EAB98ED43FA>

50

51 Key Words: Acontiinae, Amphipyrinae, *Cropia*, *Cydosia*, Cydosiinae, Stiriinae, Grotellinae,

52 Metoponiinae, Psaphidinae, Chamaecleini, phylogenetics

53

## 54 **INTRODUCTION**

55 Amphipyrinae have long been a taxon of uncertain identity. In the case of some its tribes and

56 subtribes, placement within the subfamily has been simply a matter of nomenclatural

57 convenience (Poole, 1995). In essence, Amphipyrinae became a “junk drawer” for Noctuidae: a

58 repository for taxa lacking the characters other subfamilies (Poole, 1995; Kitching, 1984;

59 Kitching & Rawlins, 1998; Fibiger & Lafontaine, 2005). As a consequence, taxonomic concepts

60 of what is and is not an amphipyrene have varied greatly through time, across continents, and

61 among workers.

62

63 Hampson’s (1898–1913) world classification of noctuids provided an expansive concept of

64 Amphipyrinae, rendering it a massive group of morphologically heterogeneous moths accounting

65 for nearly half of the world’s described noctuid genera (sensu Lafontaine & Schmidt, 2010) at

66 the time (Kitching, 1984). When Poole (1989) published his catalog of the world’s noctuid

67 genera, several groups had been removed from Amphipyrinae (e.g. Acronictinae), but his

68 Amphipyrinae still included over 500 genera. Kitching & Rawlins (1998) were so vexed by what

69 is and what is not an amphipyrene that they restricted membership to just the nominate genus,

70 *Amphipyra* Ochsenheimer.

71

72 In North America, many noctuid collections, Internet resources, and taxonomic literature are  
73 organised according to Franclemont & Todd's (1983) checklist of Nearctic moths found north of  
74 Mexico. Their concept of Amphipyrinae included more than five dozen genera presently  
75 classified as Noctuinae; many genera now assigned to Balsinae, Bryophilinae, Condicinae,  
76 Eriopinae, Metoponiinae; more than two dozen "unassociated genera," most of which were  
77 reclassified by Lafontaine & Schmidt (2010, 2015) into other subfamilies; as well as a few  
78 erebids and a nolid! In Africa, Australia, Japan, and other parts of Asia, the subfamily's limits  
79 remain more Hampsonian and nebulous, overlapping with Acronictinae, Noctuinae, and other  
80 subfamilies (Hampson, 1898–1913; Edwards, 1996).

82 Subsequent morphological and molecular studies challenged the classifications of Franclemont  
83 & Todd (1983) and Kitching & Rawlins (1998), dramatically reshuffling the contents of  
84 Amphipyrinae and other noctuid subfamilies. Fibiger & Lafontaine's (2005) reclassification of  
85 Noctuoidea relied on morphological characters to redefine families and subfamilies using known  
86 character systems such as the position of the clasper in the male genitalia and features of the  
87 tympanum, as well as novel character systems such as the presence of setae on the scaphium and  
88 whether the lateral stripe of larvae continued around the anal plate or dropped down the anal  
89 proleg. In their treatment, Amphipyrinae were restricted to just the genus *Amphipyra* plus  
90 *Phidrimana* Kononenko and *Pyrois* Hübner. Based on their assessment, Amphipyrinae,  
91 Psaphidinae, and Stiriinae exhibited mixtures of primitive and derived states and accordingly  
92 were grouped near each other in the middle of their phylogenetic sequence of subfamilies.  
93 Wagner *et al.* (2008) recommended subsuming Psaphidinae into Amphipyrinae, as a tribe, based  
94 on shared larval characters (e.g., head retracted into prothorax and A8 being sharply angulate)

95 and male genitalic features (e.g., finger-like ampulla and vesica with numerous spike-like  
96 cornuti). Lafontaine and Schmidt's (2010) concept of Amphipyrinae removed more than 150 of  
97 Franclemont & Todd's (1983) amphipyridine genera, and included Psaphidini and Stirini. The  
98 latter tribe Poole (1995), Kitching & Rawlins (1998), Mitchell *et al.* (2006), and others had  
99 previously supported as belonging in a separate subfamily.

100

101 Recent molecular phylogenetic studies also added to the sea-change of subfamilial taxonomic  
102 classification within Noctuidae. Mitchell *et al.* (2006) sampled broadly across noctuid  
103 subfamilies (sensu Lafontaine & Schmidt, 2010) including approximately 100 noctuid genera  
104 with special emphasis on subfamilies originating from shallower nodes in their noctuid  
105 phylogeny (e.g. Heliiothinae and Noctuinae). Studies by Zahiri *et al.* (2011, 2012, 2013) focused  
106 on family relationships within Noctuoidea, as well as clarifying relationships among several  
107 noctuid subfamilies originating from deeper nodes. Rota *et al.* (2016) examined noctuid  
108 subfamilial relationships in and around Acronictinae, a subfamily thought to be closely related to  
109 Amphipyrinae. Regier *et al.* (2017) assessed subfamilial relationships across Noctuidae,  
110 corroborating previous studies on subfamilial relationships and finding strong support for many  
111 deep nodes within Noctuidae. Although these studies clarified many subfamilial relationships  
112 across Noctuidae, no previous study has sampled extensively in Amphipyrinae—one of the  
113 remaining great unknowns of noctuid classification.

114

115 The guide for taxon sampling in this study was the North American (north of Mexico)  
116 Noctuoidea checklist of Lafontaine & Schmidt (2010, 2015). Their concept of the Amphipyrinae  
117 consisted of approximately 225 species in 73 genera parsed out among three tribes, eight  
118 subtribes, and an *incertae sedis* group, with the majority of this diversity occurring in deserts and

119 other aridlands of southwestern North America. In terms of generic diversity, these 73 genera  
120 represent approximately 75% of the world's amphipyridine generic diversity (JDL unpublished  
121 data). By comparison, Amphipyridinae in Europe include only nine genera, with three of these  
122 genera shared with the North American fauna (Fibiger & Hacker, 2004)

123

124 This preliminary study of the Amphipyridinae uses 5,508 base pairs from mitochondrial and  
125 nuclear genes to test the monophyly of predominantly Nearctic amphipyridines. As much as  
126 possible, type species of genera were included. Although several amphipyridine genera were not  
127 included in this study, it represents the most comprehensive phylogenetic assessment of the  
128 subfamily and the Noctuidae to date with more than 120 noctuid genera sampled, representing 21  
129 recognised subfamilies. In this effort, nomenclatural recommendations are limited to well  
130 supported results, and areas of noctuid phylogeny, proximate to the Amphipyridinae, are identified  
131 where greater taxon sampling is needed. Much discussion is given to providing adult and larval  
132 characters associated with the major clades whose content is affected by the results of this study.

133

## 134 **METHODS**

### 135 *Taxon sampling*

136 Sequence data for 63 species representing 61 noctuid genera were generated, few of which had  
137 been included in previous molecular phylogenetic studies. Fifty-seven of the 76 Nearctic genera  
138 in Amphipyridinae, as circumscribed by Lafontaine & Schmidt (2010, 2015), were included;  
139 representing all three amphipyridine tribes, all eight subtribes, and all seven *incertae sedis* genera  
140 (see Table S1 in supplementary materials). Forty-seven of the 57 amphipyridine genera were  
141 represented by their type species. For amphipyridine genera for which the type species was not

142 sampled, morphologically similar and/or COI-proximate congeners were selected. Single  
143 specimens of each species were used. Collection and deposition information for voucher  
144 specimens newly collected for this study can be found in Table S1.  
145  
146 Data newly generated for this study were combined with the dataset published by Zahiri *et al.*  
147 (2013) as well as selected taxa representing independent lineages from Rota *et al.* (2016) (Table  
148 S1). These datasets represent all of the major lineages of Noctuidae sequenced to date, using the  
149 same genes as in this study (see Gene Sampling below), and serve as outgroups. Additional  
150 outgroups included members of the other noctuoid families and, in the case of Notodontidae,  
151 were used to root the tree.

#### 152 153 Gene Sampling

154 Seven genes were sampled, which in previous studies have been shown to be capable of  
155 resolving phylogenetic relationships of Lepidoptera at differing evolutionary depths: COI, EF-  
156 1 $\alpha$ , GAPDH, IDH, MDH, RpS5, and wingless (Cho *et al.*, 1995; Fang *et al.*, 1997; Mitchell *et*  
157 *al.*, 2006; Wahlberg & Wheat, 2008; Zahiri *et al.*, 2011, 2013; Rota *et al.*, 2016; Regier *et al.*,  
158 2017). Both COI and EF-1 $\alpha$  were sequenced in two parts making for a total of nine loci. CAD,  
159 which has been used to study the molecular systematics of noctuids in conjunction with the  
160 seven genes mentioned above (Zahiri *et al.*, 2011, 2013; Rota *et al.*, 2016), was abandoned due  
161 to its low amplification success during initial PCR runs.

#### 162 163 DNA Extraction, PCR, Sequencing, and Alignment

164 All DNA extractions were done using the NucleoSpin Tissue 250 kit manufactured by Macherey-  
165 Nagel using 1-2 legs from each specimen. Once extracted, DNA was stored in a refrigerator at

166 ~4° C until needed for PCR. The PCR profiles and primers outlined in Wahlberg & Wheat (2008)  
167 were used. PCR products were sent to Macrogen Europe Inc. (Amsterdam, the Netherlands) or  
168 Macrogen USA Inc. (Rockville, Maryland) for Sanger sequencing. For the majority of loci,  
169 single forward reads were used, although some fragmented PCR products required reverse reads.  
170 Sequence chromatograms were visually inspected for base call errors and heterozygous loci in  
171 Geneious® 8.1.9 (<http://www.geneious.com>, Kearse *et al.*, 2012). Consensus sequences for dual-  
172 read loci were also generated in Geneious. To ensure sequences were attributed to the correct  
173 species, a local BLAST (Altschul *et al.*, 1990) search was conducted in Geneious to compare the  
174 manually named sequence files with the unnamed sequences from Macrogen. Sequences were  
175 then checked against sequences available in GenBank (NCBI Resource Coordinators, 2017) and  
176 BOLD (Ratnasingham & Hebert, 2007) to detect misdeterminations and contamination. After  
177 being exported to FASTA files, sequences were visually aligned to reference lepidopteran  
178 sequences for each locus using AliView version 1.18 (Larsson, 2014), and then concatenated  
179 using AMAS version 0.95 (Borowiec, 2016). Phylogenetic hypotheses were inferred for each  
180 locus to detect possible contamination. GenBank accession numbers for sequences can be found  
181 in Table S1.

182

### 183 *Phylogenetic Inference and Tree Visualization*

184 The 567 newly generated sequences were analysed in conjunction with 810 published noctuid  
185 sequences from Zahiri *et al.* (2011, 2013) and Rota *et al.* (2016). The concatenated alignment  
186 was partitioned by gene and by codon position, giving a total of 21 partitions. Phylogenetic  
187 hypotheses were inferred with RAxML using the RAxML BlackBox web-server (Stamatakis *et*



188 *al.*, 2008), IQ-TREE (Nguyen *et al.*, 2015), and MrBayes v. 3.2.6 (Ronquist *et al.*, 2012) all  
189 using the CIPRES web server (Miller *et al.*, 2010).

190

191 For the RAxML analysis, in addition to searching for the maximum likelihood tree, a bootstrap  
192 (BS) analysis with 1000 replicates was performed. For the IQ-TREE analysis, a model finding  
193 (Kalyaanamoorthy *et al.*, 2017) as well as a partition finding (Chernomor *et al.*, 2016) procedure  
194 (command TESTNEWMERGE) were run prior to searching for the maximum likelihood tree.  
195 Clade support in the IQ-TREE analysis was assessed with 1000 replicates of ultrafast bootstrap  
196 (UF) (Hoang *et al.*, 2018) and 1000 replicates of SH-aLRT (SH) (Guindon *et al.*, 2010). For the  
197 MrBayes analysis, two independent runs of 10,000,000 generations were run, each with one cold  
198 and seven heated chains. Clade support was assessed with posterior probabilities (PP). For this  
199 study, results are considered well supported or with good support for RAxML when BS  $\geq$  70  
200 (Hillis & Bull, 1993), IQ-TREE when UF  $\geq$  95 and SH  $\geq$  80 (Trifinopoulos & Minh, 2018),  
201 and MrBayes when PP  $\geq$  0.95.

202

203 The stationarity of MCMC parameters estimated with MrBayes was assessed with Tracer v 1.6.0  
204 (Rambaut *et al.*, 2014). Tree files and alignments are available from the Dryad Digital  
205 Repository: <https://doi.org/10.5061/dryad.qm2kg13>. The R (R Core Team, 2017) package ggtree  
206 v1.10.5 (Yu *et al.*, 2017) in R Studio v 1.0.383 (R Studio Team, 2015) was used to visualise and  
207 annotate the trees. Further annotation was done using GIMP and Adobe Photoshop image-editing  
208 software.

209

210 *Morphological and Life History Assessment*

211 Clade membership and topological positions of all amphipyridine genera were evaluated in terms  
212 of their male genital characters by JDL. At least one dissection was examined or newly prepared  
213 for most genera, and in all instances where a genus fell outside of Amphipyridinae, Metoponiinae,  
214 and Stiriinae as depicted in Fig. 2B. Likewise, phylogenetic positions were evaluated in terms of  
215 larval biology and morphology by DLW. Findings that reinforce or refute the molecularly  
216 inferred phylogenetic relationships are reported in the Discussion.

217

218

## 219 **RESULTS**

220 The dataset consisted of concatenated sequences of 154 noctuid species with a maximum of  
221 5,508 sites for the combined seven gene regions (and nine loci)—2,009 (36.5%) of the sites were  
222 parsimony informative. On average, each taxon's sequence data consisted of 25.1% missing or  
223 ambiguous sites. See Table S1 for sequence coverage by gene and taxon. No major signs of  
224 sequence contamination, no major conflicts among the three phylogenetic analyses, and no  
225 convergence problems in the Bayesian analysis were found. Although there was good support for  
226 many of the shallow nodes in the analysis, many deeper nodes underpinning inter-subfamilial  
227 relationships were not as well supported (a matter returned to in the Discussion). The topology of  
228 the RAxML analysis is presented in tree figures with nodal support indicated for bootstrap values  
229 greater than or equal to 70; nodal support values from the IQ-TREE and MrBayes analyses are  
230 included in relevant sections of the text.

231

232 Amphipyridinae proved to be surprisingly polyphyletic, with their genera supported as members of  
233 circa ten subfamily-level noctuid lineages (Fig. 1). A much restricted Amphipyridinae  
234 (Amphipyridinae s.s.) were suggested with over half of their species-level diversity belonging

235 elsewhere in the Noctuidae (Figs 2A,B). Amphipyridae s.s. consist largely of Lafontaine &  
236 Schmidt's (2010) tribes Amphipyridini and Psaphidini (Fig. 3) along with the East Asian genus  
237 *Nacna* Fletcher. The clade was not well supported in the RAxML analysis (BS=62), but was well  
238 supported in the IQ-TREE (UF=99, SH=99.4) and MrBayes analyses (PP=0.972).

239  
240 The amphipyridine tribe Stiriini was shown to be polyphyletic with much of its diversity spread  
241 across three subfamilies: Stiriinae **Revised Status** (BS=73, UF=99, SH=94.3, PP=0.998),  
242 Metoponiinae, and Grotellinae **Revised Status** (BS=96, UF=100, SH=100, PP=1.00) (Fig. 4).  
243 Grotellinae contain the genera of the former Grotellina, except *Hemigrotella* Barnes &  
244 McDunnough, which grouped within Amphipyridae s.s. Stiriinae comprise two tribes: Stiriini  
245 **Revised Status** (BS=91, UF=100, SH=94.7, PP=0.912) and Annaphilini **Revised Status**. Stiriini  
246 contain, in large part, the contents of the former Stiriina, as well as *Nartheophora* Smith  
247 (formerly a member of the amphipyridine subtribe Azeniina) and two genera listed as *incertae*  
248 *sedis* in Stiriini by Lafontaine & Schmidt (2010): *Argentostiria* Poole and *Bistica* Dyar.  
249 Annaphilini contain *Annaphila* Grote and *Axenus* Grote (not included in this analysis). Stiriinae  
250 grouped sister to the clade containing Metoponiinae, Cydosiinae, and Grotellinae (BS=65,  
251 UF=99, SH=100, PP=0.979).

252  
253 *Azenia* Grote (type genus of Azeniina) grouped within the clade containing Metoponiinae and  
254 Cydosiinae (BS=64, UF=99, SH=97.1, PP=0.959). Also clustering here were three other  
255 amphipyridine genera: *Sexserrata* Barnes & Benjamin, *Tristyla* Smith, and *Metaponpneumata*  
256 Möscher. *Sexserrata* and *Tristyla* grouped sister to one another (BS=100, UF=100, SH=97.9,  
257 PP=1.00), with *Metaponpneumata* sister to *Cydosia* Duncan [& Westwood] (BS=93, UF=99,  
258 SH=97.4, PP=1.00), the lone genus in Cydosiinae. This Metoponiinae and Cydosiinae clade in

259 turn was sister to Grotellinae (BS=88, UF=99, SH=99.5, PP=0.979). *Azenia*, *Tristyla*, *Sexserrata*,  
260 and *Metaponpneumata* are transferred to Noctuidae *incertae sedis* (see Discussion).

261

262 Four genera placed in Stiriini *incertae sedis* by Lafontaine & Schmidt (2010) were supported  
263 (BS=97, UF=100, SH=99.9, PP=1.00) as sister to the Acontiinae: *Chamaeclea* Grote,

264 *Heminocloa* Barnes & Benjamin, *Hemioslaria* Barnes & Benjamin, and *Thurberiphaga* Dyar

265 (Fig. 5). Chamaecleini Keegan & Wagner **New Tribe** is erected in Acontiinae for this clade of

266 four genera which is formally described in the Discussion.

267

268 Three amphipyridine genera clustered with more remote subfamilies: *Nacopa* Barnes & Benjamin

269 was supported as sister to other Noctuinae included in this analysis (BS=100, UF=100, SH=99.6,

270 PP=1.00), *Acopa* Harvey was supported as nesting within the Bryophilinae (BS=99, UF=100,

271 SH=96.8, PP=1.00), and *Aleptina* Dyar was supported as sister to *Hemicephalis* Möschler

272 (BS=100, UF=100, SH=99.4, PP=1.00) within Condicinae (Fig. 6). Male genitalic characters

273 support these three (unexpected) results (see Discussion). *Nacopa*, *Acopa*, and *Aleptina* are

274 transferred to Noctuinae, Bryophilinae, and Condicinae, respectively.

275

276 A surprising finding was that *Oxycnemis* Grote contains both amphipyridines and oncocnemidines;

277 the type species of *Oxycnemis*, *O. advena* Grote, clustered within Amphipyridinae s.s. (Fig. 3),

278 whereas *O. gracillinea* (Grote) and *Leucocnemis perfundis* (Smith) clustered within

279 Oncocnemidinae (Fig. 7) (BS=100, UF=100, SH=100, PP=1.00). *Leucocnemis* Hampson and *O.*

280 *gracillinea*, but not *Oxycnemis*, are transferred to Oncocnemidinae (see Discussion).

281

282 Also unexpected was the placement of the amphipyridine genus *Cropia* Walker which did not

283 group with any individual subfamily. It instead grouped with the subfamilies Acronictinae  
284 through Amphipyrinae as shown in Figs 2A,B (BS=61, UF=92, SH=91, PP=0.977) with this  
285 group of subfamilies set apart as their own clade (BS=42, UF=96, SH=88.1, PP=0.97), i.e.  
286 *Cropia* was placed as the sister taxon to this massive group of taxa.

287

## 288 **DISCUSSION**

289

290 The suspicions and misgivings of generations of workers that the Amphipyrinae were an  
291 unnatural grouping are confirmed, and staggeringly so—the 57, mostly Nearctic, amphipyrene  
292 genera surveyed fell into circa ten different subfamily-level taxa. Many taxonomic changes are  
293 needed in order to render the Amphipyrinae and other family group taxa monophyletic.  
294 Taxonomic changes (see Table 1) are recommended only for those results believed (using the  
295 seven-gene data set along with knowledge of larval morphology, adult morphology, and ecology)  
296 to be robust and unlikely to be affected by additional taxon sampling.

297

298 Many deeper relationships within Noctuidae (e.g. inter-subfamilial) were not well supported, as  
299 well as many subgroupings in Amphipyrinae s.s. Broader taxonomic coverage within Noctuidae  
300 and Amphipyrinae s.s., more genetic data, and/or coalescent-based phylogenetic analyses will be  
301 needed to resolve these relationships, and before formal taxonomic changes within  
302 Amphipyrinae s.s. should be made. A fuller assessment of Amphipyrinae s.s. as well as noctuid  
303 inter-subfamilial relationships is currently underway by us, with special emphasis on the  
304 subfamilies between and including Acontiinae and Amphipyrinae as shown in Fig. 2B.

305

306 Presented below are discussions of the fates of amphipyrene taxa, beginning with true  
307 Amphipyrinae (Amphipyrinae s.s.) and then moving through the amphipyrene taxa that fell  
308 outside of Amphipyrinae s.s. A limited discussion of subfamilial relationships in Noctuidae is  
309 also provided in relevant sections. For many of the tribes or subfamilies affected, a brief  
310 characterization of the morphological and life history data supporting a recommended taxonomic  
311 decision is provided.

312  
313 Amphipyrinae s.s.

314 In large measure, the amphipyrene and psaphidine genera from Lafontaine & Schmidt's (2010,  
315 2015) checklist were confirmed as amphipyrenes, as was the East Asian genus *Nacna*, confirming  
316 the findings of Rota *et al.* (2016). Excluded from Amphipyrinae s.s. were the entirety of  
317 Lafontaine & Schmidt's (2010) Stiriini, which were largely dispersed among Stiriinae,  
318 Metoponiinae, and Grotellinae.

319  
320 Amphipyrinae s.s. were not well supported by the RAxML analysis, but were in the other  
321 analyses. This clade was found to be well supported in previous studies based on two genes and  
322 five taxa (Mitchell *et al.*, 2006), five genes and two taxa (Regier *et al.* 2017), or eight genes and  
323 two taxa (Zahiri *et al.*, 2013). One reason for the lack of support for this group in the RAxML  
324 analysis and groupings therein might be model misspecification, as only the GTR model can be  
325 assigned to each partition in RAxML, whereas the IQ-TREE analysis explored model space and  
326 assigned the most likely model to each partition. Another potential reason for lower bootstrap  
327 support is the inclusion of multiple relatively long-branch taxa within Amphipyrinae s.s. (e.g.  
328 *Feralia* Grote, *Emarginea* Guenée, *Hemigrotella*, and *Miracavira* Franclemont), which can  
329 lower bootstrap values even for true clades (Van de Peer *et al.*, 2000).

330

331 Unlike in previous molecular studies, little support was found for the Psaphidini being  
332 monophyletic. In Europe Psaphidini are given subfamily status separate from Amphipyrinae  
333 (Fibiger & Hacker 2007). The reasons for this lack of support may well be the same as those  
334 mentioned for the lack of support of Amphipyrinae s.s.

335

336 Given the shortness of several (deeper) internal branches and weak nodal support within  
337 Amphipyrinae s.s., it would be premature to formally delimit amphipyrine tribes and subtribes  
338 before more sampling is done across amphipyrine genera (especially beyond the Nearctic  
339 Region), and/or genomic-scale data are used.

340

#### 341 Stiriinae

342 As suggested by their larvae and life histories (Crumb, 1956; Wagner *et al.*, 2011), adult  
343 morphology (Poole, 1995), and a recent molecular study of the Noctuidae (Regier *et al.*, 2017),  
344 the Stiriinae were found to represent a distinct subfamily (Figs 2B,4). As defined here, Stiriinae  
345 are trimmed relative to previous concepts (Franclemont & Todd, 1983; Poole, 1995; Lafontaine  
346 & Schmidt, 2010); restricted to what Lafontaine & Schmidt (2010) regarded as the subtribes  
347 Stiriina (with the addition of *Nartheophora*) and Annaphilina, both of which are here elevated  
348 to tribes.

349

350 Stiriinae are distributed mainly in southwestern North America, and reach greatest  
351 diversity in deserts and adjacent aridlands (Hogue, 1963). It is suspected their species and  
352 generic richness in Mexico will greatly exceed that found north of the Mexico-US border.

353 Within Stiriini, all but a few early diverging genera are thought to be specialists on

354 Asteraceae. Most included taxa are reliant on reproductive tissues, either flowers or  
355 callow seeds, as larvae. *Annaphila* are specialists on Boraginaceae, Montiaceae, and  
356 Phrymaceae. The subfamily is currently the focus of a species-level phylogenetic and  
357 biogeographic study by KKK.

358

#### 359 Grotellinae

360 The clade including *Grotella* Harvey, *Neogrotella* Barnes & Benjamin, and  
361 *Grotellaforma* Barnes & Benjamin (Fig. 4) is non-problematic—it is well supported by  
362 molecular, adult, larval, and life history data. Given its sister-group relationship to the  
363 clade containing Metoponiinae and Cydosiinae and relative age (branch depth), this  
364 group is recognised as a subfamily, Grotellinae, elevated from its previous rank as a  
365 subtribe. The Grotellinae are endemic to the deserts of southwestern North America and  
366 contain 23 described species (Poole, 1989). So far as known, all species are dietary  
367 specialists of Nyctaginaceae. Although several species feed on leaves, especially in early  
368 instars, most are flower and seed predators with their phenology closely tied to that of a  
369 single local host.

370

#### 371 Metoponiinae and Cydosiinae

372 This grouping of taxa (Fig. 4) is the most unorthodox and perplexing presented here. It's unclear  
373 if the group is comprised mostly of long-branch misfits or if it is a natural, but phenotypically  
374 divergent, assemblage. Denser taxon sampling across this curious collection of genera is needed  
375 to better understand their phylogenetic relationships.



377 Of the seven genera treated here, the phenotypic outlier is *Cydosia*, a small, mostly tropical,  
378 genus with magnificent, highly derived larvae that seemingly set them apart from those of  
379 neighboring lineages: i.e., the prolegs on A3 and A4 are present but reduced; the D2 and SD  
380 pinacula are exceedingly elongate (sometimes  $> 15 \times$  their width) on A1 and often proximate  
381 thoracic segments as well as on A2 and A3; and the apical seta on each such elongated  
382 pinaculum is lamelliform (Figs 8C,D). Early American workers commonly placed *Cydosia* in  
383 Acontiinae (McDunnough, 1938; Franclemont & Todd, 1983). Lafontaine & Schmidt (2010)  
384 transferred *Cydosia* into its own subfamily. The analyses of Zahiri *et al.* (2013) and Rota *et al.*  
385 (2016) placed *Cydosia* within Metoponiinae (rendering Metoponiinae paraphyletic in treatments  
386 that accord subfamilial rank to Cydosiinae). The results of this study reaffirm their findings and  
387 suggest four additional genera may be metoponiines: *Azenia*, *Metaponpneumata*, *Sexserrata*, and  
388 *Tristyla*.

389

390 *Metaponpneumata* and *Cydosia* grouped sister to one another. That *Cydosia* would share  
391 a recent common ancestor with *Metaponpneumata*, a small, gray, nondescript denizen of  
392 North American deserts with a similarly subdued larva (Figs 8A-D) was not expected.

393 When *Metaponpneumata* was removed from the analysis the same topology was  
394 recovered with respect to *Flammona* Walker, *Panemeria* Hübner, and *Cydosia* (results  
395 not shown) as in Zahiri *et al.* (2013) and Rota *et al.* (2016). Interestingly, both *Cydosia*  
396 and *Metaponpneumata* are dietary generalists; so far as known other Metoponiinae are  
397 known or believed to be hostplant specialists (DLW unpublished data). Given the  
398 surprising relationships in this part of the tree, but sparse taxon sampling, no  
399 recommendations as to subfamily delineation or membership are given. Instead, these

400 four amphipyrene genera (*Azenia*, *Metaponpneumata*, *Sexserrata*, *Tristyla*), along with  
401 the subtribe Azeniina, are placed into Noctuidae *incertae sedis*.

402

#### 403 Acontiinae and Chamaecleini

404 The genera *Chamaeclea*, *Heminocloa*, *Hemioslaria*, and *Thurberiphaga* formed a clade sister to  
405 the two acontiines included in the analysis: *Acontia lucida* (Hufnagel) and *Acontia trabaelis*  
406 (Scopoli) (Fig. 5). These four former amphipyrene genera are provisionally and conservatively  
407 included in the tribe Chamaecleini in Acontiinae on the basis of adult morphological characters  
408 and shared life history associations, however no characters were found in the larvae that uniquely  
409 link Chamaecleini to Acontiinae (see the description of Chamaecleini at the end of the  
410 Discussion).

411

#### 412 Noctuinae and Bryophilinae

413 Male genitalic characters support the new assignments of both *Acopa* and *Nacopa* (their  
414 larvae are unknown). The male genitalia of *Acopa* would not immediately be recognised  
415 as belonging to the Bryophilinae because the valve is short, 2 × as long as the sacculus,  
416 and heavily sclerotised, whereas in most Bryophilinae the valve is long, usually 3 × as  
417 long as the sacculus and is weakly sclerotised. Two features of the valve are similar to  
418 those found in the Bryophilinae: the uncus is flattened and slightly spatulate apically, and  
419 the clasper appears to arise from the costal margin of the valve, which is a feature  
420 common to many *Bryophila* Treitschke in Eurasia. No specimens of other New World  
421 bryophilines (e.g. “*Cryphia*” Hübner) from North America were included in this study, so  
422 the relationship of *Acopa* to the other New World representatives of the subfamily  
423 remains unclear, but some species, e.g., “*Cryphia*” *olivacea* (Smith), have a minute

424 rounded clasper at the same position on the costal margin of the valve and with the same  
425 orientation as *Acopa*.

426

427 *Nacopa* has unusual valves for the subfamily Noctuinae in that the sacculus is massive,  
428 occupying about three quarters of the volume of the valve, but like other Noctuinae the  
429 clasper is high on the valve but still connected to the lower margin by the thin sclerotised  
430 band discussed by Lafontaine & Poole (1991: 21). Being placed sister to much of the rest  
431 of the Noctuinae in this study, *Nacopa* may provide evolutionary insight into early  
432 aspects of the radiation of Noctuinae—one of the most ecologically successful and  
433 economically important clades of Lepidoptera (Zhang 1994, Mitchell *et al.*, 2006).

434

435 Condicinae

436 *Aleptina* was well supported as sister to *Hemicephalis* (Fig. 6). Early North American  
437 workers placed *Aleptina* in the Acontiinae (McDunnough, 1938; Franclemont & Todd,  
438 1983; Todd *et al.*, 1984). The genus was transferred without explanation to the  
439 amphipyrene subtribe Triocnemidina by Lafontaine & Schmidt (2010). The larvae,  
440 recently revealed to be specialists on various species of *Tiquilia* (Boraginaceae) (DLW  
441 unpublished data), are consistent with other condicines, but have only two SV setae on  
442 A1, like most higher Noctuidae, and unlike other genera of Condicinae. *Aleptina* larvae  
443 resemble miniature versions of the condicine *Diastema* Guenée: the head is partially  
444 retracted into the prothorax, the prolegs on both A3 and A4 are modestly reduced, A8 is  
445 humped, and the spiracular stripe (when present) runs from the spiracle on A8 down the  
446 anal proleg. McDunnough (1938) had placed *Aleptina* and *Diastema* proximate in his  
447 checklist—a position unchanged in Franclemont & Todd (1983) and now supported by

448 this study. Before the nuclear and mitochondrial DNA phylogeny of Zahiri *et al.* (2012)  
449 few would have thought *Hemicephalis* (previously held to be an erebid) would in fact  
450 belong in the Noctuidae, let alone the Condicinae. However, taxon sampling remains  
451 sparse in this area of the tree. Increased taxon sampling in and around this area is needed,  
452 e.g. to investigate if *Aleptina* and *Diastema* are in fact Condicinae, and not  
453 representatives of a separate known (or unknown) subfamily.

454

455 Oncocnemidinae

456 Lafontaine & Schmidt (2010) placed *Leucocnemis* in the amphipyrene subtribe Triocnemidina.  
457 Its type, *Leucocnemis perfundis*, grouped with both oncocnemidines in this study (Fig. 7).  
458 Consistent with this placement, the larva has the first two pairs of prolegs greatly reduced; the  
459 setae are relatively long and borne from minute white warts; and the D2 setae on A8 arise from  
460 warts on a sharply angled, transverse ridge. The caterpillar's fitful, prolonged alarm response is  
461 typical for oncocnemidines, but unknown from amphipyrenes. Because *L. perfundis* is the type  
462 species, *Leucocnemis* is transferred to Oncocnemidinae. It is possible that some *Leucocnemis*  
463 may be triocnemidine amphipyrenes.

464

465 The polyphyly found in *Oxycnemis* based on molecular data is also supported by life history data  
466 and larval characters. *Oxycnemis gracillinea*, which groups with oncocnemidines, feeds on  
467 *Menodora* (Oleaceae) (many Oncocnemidinae feed on this plant family) (Wagner *et al.*, 2011;  
468 DLW unpublished data). The caterpillar of *O. gracillinea* differs from those of *O. advena* in  
469 having no obvious rump over A8, inconspicuous dorsal pinacula, and reduced prolegs on A3 and  
470 A4—traits common to oncocnemidines. Both *O. advena* and its California cousin, *O. fusimacula*  
471 Smith, are *Krameria* (Krameriaceae) feeders. Both have a strongly humped A8, enlarged white

472 dorsal pinacula; and full-sized anterior prolegs—traits common to amphipyridine larvae; the  
473 caterpillars also lack the thrashing alarm response of onconemidines. Because *O. advena* is the  
474 type species of *Oxycnemis* the genus is retained in Amphipyridinae. *O. gracillinea* is placed in  
475 Onconemidinae without generic assignment.

476

#### 477 *Cropia* Walker

478 *Cropia*, a Neotropical genus with 24 species (Poole 1989), fell outside of any known subfamily,  
479 and has long been recognised as an anomalous noctuid and dubious member of Amphipyridinae  
480 (Robert Poole, pers. comm.). The male genitalia of *Cropia connecta* (Smith) corroborate the  
481 molecular findings in that they are odd for Noctuidae: they are relatively large, weakly  
482 sclerotised, and set with a curious abundance of soft piliform setae. *C. connecta*, the sole  
483 representative of the genus in this study, has genitalia substantially different from those of the  
484 type species, *C. hadenoides* Walker. The larva of *C. hadenoides* also differs markedly from other  
485 species in the genus (Dan Janzen pers. comm.). Given the possibility that *Cropia* may represent  
486 two distinct lineages, no subfamily assignment of *Cropia* is recommended other than its removal  
487 from Amphipyridinae and placement in Noctuidae *incertae sedis*.

488

#### 489 Taxonomy

490

491 **Chamaecleini Keegan & Wagner, 2018 New Tribe (Noctuidae, Acontiinae).**

492

493 <http://zoobank.org/urn:lsid:zoobank.org:act:0D86A34B-AB52-4114-B6C7-1EC2953D0175>

494

495

496 **Type genus:** *Chamaeclea* Grote, 1883.

497 **Type species:** *Chariclea pernana* Grote, 1881.

498

499 **Diagnosis:** Chamaecleini differ from other tribes of the Acontiinae in having scattered setae on  
500 the scaphium, not clustered into a tuft or tufts of setae; claspers symmetrical or very slightly  
501 asymmetrical, not markedly asymmetrical; larvae with prolegs on A3–A6 and without modified  
502 anal setae of Acontiini.

503

504 **Adult Description:** Characters in **bold** distinguish Chamaecleini from other Acontiinae,  
505 characters in *italics* are shared with and apomorphic for Acontiinae.

506 Head: antenna of male and female filiform, scaled dorsally; laterally and ventrally unscaled and  
507 densely pubescent with minute setae; **frons with frontal tubercle consisting of raised rounded**  
508 **ring, open ventrally, with low conical tubercle in center**; eye rounded, smooth; palpi porrect,  
509 scaled, without tufts; haustellum functional, coiled. Thorax: prothoracic collar and thorax clothed  
510 with spatulate, apically serrated, scales; forewing with typical noctuid quadrifine venation (i.e.,  
511 vein M<sub>2</sub> close to M<sub>3</sub>); hind wing venation trifine (M<sub>2</sub> reduced, slightly closer to M<sub>3</sub> than to M<sub>1</sub>;  
512 legs typical of most Noctuidae (without spine-like setae on tibiae, and without spine at apex of  
513 foretibia); *tympanal opening with hood vestigial, and alula enlarged and clothed with large flat*  
514 *scales that cover 1/3–2/3 of opening*; **tympanal sclerite a sclerotised ridge with surface only**  
515 **slightly nodular**, unlike nodular sclerite of most higher Noctuidae. Abdomen: long slender  
516 apodemes on basal sternite; without basal hair-pencils, levers, or pockets. Male genitalia: uncus  
517 slender, sparsely setose, curved downward to pointed apex; tegumen broad, tapered abruptly  
518 ventrad, connected to vinculum by broad plural sclerite fused to vinculum; vinculum broadened  
519 ventrally into U-shaped saccus; scaphium mainly membranous, lightly sclerotised ventrally, **with**  
520 **scattered short setae dorsally, not clustered into one or two patches as in Acontiini**; valves  
521 **symmetrical**; sacculus extending from valve base 1/3 of distance to valve apex and differentiated  
522 from clasper only by lightly sclerotised junction; clasper broad basally with more heavily-

523 sclerotised lobe on dorsum and ending in small rounded lobe near valve apex; valve with no  
524 apical corona of heavily sclerotised setae; aedeagus  $5 \times$  as long as wide; vesica slightly longer  
525 than aedeagus with ventral and subbasal pouches with spinules on subbasal pouch and near  
526 vesica apex. Female genitalia: Anal papillae long and tapered to apex, clothed with short setae;  
527 posterior and anterior apophyses long  $4 \times$  and  $3 \times$  as long as abdominal segment 8; ductus bursae  
528  $3 \times$  as long as abdominal segment 8, lightly sclerotised posteriorly; corpus bursae very long and  
529 slightly coiled,  $16 \times$  as long as abdominal segment 8. Tapered anal papillae and elongated  
530 apophyses suggest telescoping oviposition, probably into flowers.

531

532 **Larval Description**: Characters in **bold** distinguish Chamaecleini from other Acontiinae.  
533 **Fully legged with well-developed, crochet-bearing prolegs on A3–A6; dorsal and ventral**  
534 **anal comb setae described by Crumb (1956) lacking; spinneret elongate; SV1 is well**  
535 **forward of SV2 and SV3.** Feed on seeds and flowers of Malvaceae.

536

537 **Included Taxa**: *Chamaeclea* includes two species with *C. basiochrea* Barnes & McDunnough  
538 from Texas being similar both in external appearance and in genital characters to *C. pernana*. In  
539 addition to *Chamaeclea*, the Chamaecleini include four monobasic genera that differ from  
540 *Chamaeclea* in the following: ***Heminocloa mirabilis*** (Neumoegen) [setae on scaphium long,  
541 hair-like; male valve strap-like; clasper heavily sclerotised and well differentiated from sacculus,  
542 with dorsal process in middle and pointed apical process free from valve]; female genitalia not  
543 examined. ***Hemioslaria pima*** Barnes & Benjamin [only a few minute setae on scaphium; male  
544 genitalia similar to those of *H. mirabilis*, except valve almost triangular due to large dorsal lobe;  
545 clasper without dorsal process; vesica globular]; female genitalia not examined. ***Thurberiphaga***  
546 ***diffusa*** (Barnes) [antenna lamellate, branches longer in males than females; clasper fused into

547 valve, made evident mainly by series of setae on bumps along middle of valve; female genitalia  
548 with anal papillae short, pad-like and densely setose; apophyses and ductus bursae relatively  
549 short; corpus bursae about  $4 \times$  as long as abdominal segment 8 and pear shaped]. Larvae are  
550 known for three genera: *Chamaeclea*, *Heminocloa*, and *Thurberiphaga*. All feed on Malvaceae  
551 as do most Acontiinae (Crumb, 1956; Wagner *et al.*, 2011; DLW unpublished data). The smooth,  
552 grub-like caterpillars bore into ripening fruits to feed on seeds—a far less common feeding  
553 strategy than leaf feeding among acontiines (Crumb, 1956; DLW unpublished data). Larval  
554 characters for *Heminocloa* and *Thurberiphaga*, as given above, except spinneret long-enough to  
555 bear lateral sclerites in both genera.

556 **Remarks:** Although molecular, adult genital and tympanal characters, and life history data  
557 suggest a sister group relationship between Acontiini and Chamaecleini, no larval characters  
558 were found that were uniquely shared with Acontiini, i.e. none of the characters in Crumb's  
559 (1956) larval key to noctuid subfamilies apomorphic for Acontiinae is expressed in the known  
560 larvae of Chamaecleini. Crumb (1956) treated the larva of *Thurberiphaga*, but left it unassigned  
561 to any subfamily.

562

## 563 CONCLUSION

564 The realm of Amphipyridae has waxed and waned for more than a century, with no two major  
565 taxonomic works seeming to agree on the limits of the subfamily. More expansive concepts have  
566 spanned the subfamilies that were the focus of this study (e.g., Edwards, 1996) whereas others  
567 restricted its content to just the nominate genus (e.g., Kitching & Rawlins, 1998). In most  
568 checklists and faunal works Amphipyridae served as a repository for noctuids that lacked the  
569 synapomorphies of acontiines, acronictines, bagisarines, eustrotiines, cuculliines,



570 oncocnemidines, plusiines, and others. This contribution is a step forward and provides  
571 phylogenetic scaffolding around which future taxonomic and phylogenetic efforts can be built.  
572  
573 Future efforts are needed to add more Old World taxa, especially from East Asia and the southern  
574 Hemisphere, and much remains to be done with the fauna of North America. Central and  
575 northern Mexico could prove to be the cradle for much the New World diversity of  
576 Amphipyriinae, Grotellinae, Metoponiinae, and Stiriinae. The type species for more than a dozen  
577 genera included in the Amphipyriinae by Lafontaine & Schmidt (2010) have yet to be sampled,  
578 and it is not improbable that other amphipyriines, unrecognised as such, still reside within other  
579 subfamilies. In addition to Amphipyriinae, the monophyly of other subfamilies (e.g.,  
580 Metoponiinae, Oncocnemidinae, and Stiriinae) were also revealed to be in need of closer  
581 scrutiny. Some taxa (e.g. Cydosiinae) were shown to potentially be poor candidates for  
582 subfamilial rank, whereas others were found to be perhaps worthy of subfamilial status (e.g.  
583 *Cropia* and *Chamaecleini*).  
584  
585 As noted above, the seven genes used resolved relationships within virtually every subfamily-  
586 level taxon, but frustratingly only modest or ambiguous support for the phylogenetic  
587 relationships among the various noctuid subfamilies—a finding that supports the suggestions of  
588 others that the early radiation of the Noctuidae was a rapid one (Wahlberg *et al.*, 2013, Zahiri *et*  
589 *al.*, 2013). Adding more taxa and/or more genes may help clarify inter- and intra-subfamilial  
590 relationships in Noctuidae; likewise coalescent-based phylogenetic inference methods should  
591 help combat the confounding effects of incomplete lineage sorting that tend to plague rapid  
592 radiations.  
593

594 As much as possible type species were emphasised in this assessment because it was evident at  
595 the outset that several amphipyridine s.l. genera were polyphyletic, such as *Oxycnemis* and  
596 *Leucocnemis*. Other genera that appear to be unnatural assemblages include *Aleptina*, *Azenia*,  
597 *Nocloa* Smith, *Paratrachea* Hampson, *Paramiana* Barnes & Benjamin, and *Plagiomimicus*  
598 Grote.

599

600 It is hoped that the relationships hypothesised in this work will facilitate efforts to identify  
601 further morphological and life history data that can be used to corroborate or refute the  
602 relationships presented in Figs 2A,B. Given the weak support for some clades, larval,  
603 anatomical, behavioral, and life history details could do much to test this study's findings. Even  
604 in those cases where support is strong, such information is needed to add biological meaning to  
605 the inferred clades and their taxonomic concepts.

606

## 607 **ACKNOWLEDGEMENTS**

608 Many of the taxa in this study are desert dwellers, tied to the stochasticity of desert rains, and as  
609 such are immensely difficult for one person to collect in a single year or even lifetime. The  
610 authors owe an immense debt to those who provided amphipyridine s.l. taxa. Three were especially  
611 generous with their specimens, time, and unpublished data: John Palting, Evan Rand, and David  
612 Wikle. The latter made a special effort to fill taxonomic gaps in preliminary analyses. Additional  
613 specimens used here were supplied by Robert Behrstock, John DeBenedictis, Cliff Ferris, Ann  
614 Hendrickson, Sam Jaffe, Ed Knudson, and Eric Metzler. Sequence data were interwoven into a  
615 pre-existing latticework built by Reza Zahiri and co-workers. Marek Borowiec assisted with  
616 initial sequence alignment and an initial phylogenetic analysis. Kennedy Marshall helped with  
617 artwork and figure design. Jim Dice, Gina Moran, and the California Department of Food and

618 Agriculture assisted with collecting permits for Anza-Borrego Desert State Park in 2016 and  
619 2017; the Steele-Burnand Desert Research Institute hosted KLK, DLW, and others in both years.  
620 The authors also thank Jonena Hearst and Raymond Simpson for assisting with permitting and  
621 logistics for Big Bend and Guadalupe Mountains National Parks. Steven Passoa (USDA/APHIS/  
622 PPQ) assisted in morphological analysis of Chamaecleini larvae. The authors are grateful to  
623 Charles Mitter and two other referees for helpful comments on the manuscript. KLK is supported  
624 by grants from the Society of Systematic Biologists (Graduate Student Research Award), the  
625 Department of Ecology and Evolutionary Biology at the University of Connecticut (Zoology  
626 Award), as well as many generous donors that contributed to an Instrumentl [sic] crowd-funding  
627 grant. NW acknowledges support from the Swedish Research Council. DLW is supported by  
628 USFS Co-op Agreement 14-CA-11420004-138 and an award from the Richard P. Garmany Fund  
629 (Hartford Foundation for Public Giving).

630

### 631 **CONFLICT OF INTEREST**

632 The authors declare no conflict of interest.

633

634 **REFERENCES**

- 635  
636 Altschul, S.F., Gish, W., Miller, W., Myers, E.W. & Lipman, D.J. (1990) Basic local alignment  
637 search tool. *Journal of Molecular Biology*, **215**, 403–410.  
638  
639 Borowiec, M.L. (2016) AMAS: a fast tool for alignment manipulation and computing of  
640 summary statistics. *PeerJ*, **4**, e1660.  
641  
642 Chernomor O., von Haeseler A. & Minh B.Q. (2016) Terrace aware data structure for  
643 phylogenomic inference from supermatrices. *Systematic Biology*, **65**, 997–1008.  
644  
645 Cho, S., Mitchell, A., Regier, J.C., Mitter, C., Poole, R.W., Friedlander, T.P. & Zhao, S. (1995) A  
646 highly conserved nuclear gene for low-level phylogenetics: elongation factor-1a recovers  
647 morphology-based tree for heliothine moths. *Molecular Biology and Evolution*, **12**, 650–656.  
648  
649 Crumb, S.E. (1956) *The Larvae of the Phalaenidae*. Technical Bulletin # 1135, United States  
650 Department of Agriculture, Washington, D.C., USA.  
651  
652 Edwards, E.D. (1996) Noctuidae. *Checklist of the Lepidoptera of Australia* (ed. by E.S. Nielsen,  
653 E. D. Edwards and T. V. Rangsi), pp. 291–333. CSIRO Publishing, Collingwood, Victoria,  
654 Australia.  
655  
656 Fang, Q.Q., Cho, S., Regier, J.C., Mitter, C., Matthews, M., Poole, R.W., Friedlander, T.P. &  
657 Zhao, S. (1997) A new nuclear gene for insect phylogenetics: dopa decarboxylase is  
658 informative of relationships within Heliothinae (Lepidoptera: Noctuidae). *Systematic Biology*,  
659 **46**, 269–283.  
660  
661 Fibiger, M. & Hacker, H. (2004) Systematic list of the Noctuoidea of Europe. *Esperiana*, **11**, 83–  
662 172.  
663  
664 Fibiger, M. & Hacker, H. (2007) *Noctuidae Europaeae, Amphipyrinae, Condicinae, Eriopinae,*  
665 *Xyleninae* (Part), Vol. 9. Entomological Press, Sorø, Denmark.  
666  
667 Fibiger, M. & Lafontaine, J.D. (2005) A review of the higher classification of the Noctuoidea  
668 (Lepidoptera), with special reference to the Holarctic fauna. *Esperiana*, **11**, 7–92.  
669  
670 Franclemont, J.G. & Todd, E.L. (1983) Noctuidae. *Check List of the Lepidoptera of America*  
671 *North of Mexico*, (ed. by R.W. Hodges *et al.*), pp. 120–159. E.W. Classey Ltd. and The Wedge  
672 Entomological Research Foundation, Cambridge University Press, Cambridge, UK.  
673  
674 Guindon, S., Dufayard, J.-F., Lefort, V., Anisimova, M., Hordijk, W. & Gascuel, O. (2010) New  
675 algorithms and methods to estimate maximum-likelihood phylogenies: assessing the  
676 performance of PhyML 3.0. *Systematic Biology*, **59**, 307–321.  
677  
678 Hampson, G.F. (1898–1913) *Catalogue of the Lepidoptera Phalaenae in the British Museum*,  
679 British Museum Order of the Trustees, London, UK.  
680

- 681 Hillis, D.M. & Bull, J.J. (1993) An empirical test of bootstrapping as a method for assessing  
682 confidence in phylogenetic analysis. *Systematic Biology*, **42**, 182–192.  
683
- 684 Hoang, D.T., Chernomor, O., von Haeseler, A., Minh, B.Q. & Vinh, L.S. (2018) UFBoot2:  
685 improving the ultrafast bootstrap approximation. *Molecular Biology and Evolution*, **35**, 518–  
686 522.  
687
- 688 Hogue, C.L. (1963) A definition and classification of the tribe Stiriini (Lepidoptera: Noctuidae).  
689 *Los Angeles County Museum Contributions in Science*, **64**, 1–129.  
690
- 691 Kalyaanamoorthy, S., Minh, B.Q., Wong, T.K.F., von Haeseler, A. & Jermin, L.S. (2017)  
692 ModelFinder: fast model selection for accurate phylogenetic estimates. *Nature Methods*, **14**,  
693 587–589.  
694
- 695 Kearse, M., Moir, R., Wilson, A., Stones-Havas, S., Cheung, M., Sturrock, S., Buxton, S.,  
696 Cooper, A., Markowitz, S., Duran, C., Thierer, T., Ashton, B., Mentjies, P. & Drummond, A.  
697 (2012) Geneious basic: an integrated and extendable desktop software platform for the  
698 organization and analysis of sequence data. *Bioinformatics*, **28**, 1647–1649.  
699
- 700 Kitching, I.J. (1984) An historical review of the higher classification of the Noctuidae  
701 (Lepidoptera). *Bulletin of the British Museum (Natural History) (Entomology)*, **49**, 153–234.  
702
- 703 Kitching, I.J. & Rawlins, J.E. (1998) The Noctuoidea. *Lepidoptera, Moths and Butterflies. Vol. I:  
704 Evolution, Systematics, and Biogeography, Handbook for Zoology, Vol. IV: Arthropoda:  
705 Insecta* (ed. N.P. Kristensen), pp. 355–401. Walter de Gruyter, Berlin, Germany.  
706
- 707 Lafontaine, J.D. & Poole, R.W. (1991) Noctuoidea, Noctuidae (Part) - Plusiinae. *The Moths  
708 America north of Mexico, Fascicle 25.1* (ed. by R.W. Hodges *et al.*). The Wedge  
709 Entomological Research Foundation, Washington, D.C., USA.  
710
- 711 Lafontaine, J.D. & Schmidt, B.C. (2010) Annotated check list of the Noctuoidea (Insecta,  
712 Lepidoptera) of North America north of Mexico. *ZooKeys*, **40**, 1–239.  
713
- 714 Lafontaine, J.D. & Schmidt, B.C. (2015) Additions and corrections to the check list of the  
715 Noctuoidea (Insecta, Lepidoptera) of North America north of Mexico III. *ZooKeys*, **527**, 127–  
716 147.  
717
- 718 Larsson, A. (2014) AliView: a fast and lightweight alignment viewer and editor for large  
719 datasets. *Bioinformatics*, **30**, 3276–3278.  
720
- 721 McDunnough, J.H. (1938) Checklist of the Lepidoptera of Canada and the United States of  
722 America. Part 1. Macrolepidoptera. *Memoirs of the Southern California Academy of Sciences*,  
723 **1**, 1–275.
- 725 Miller, M.A., Pfeiffer, W. & Schwartz, T. (2010) Creating the CIPRES Science Gateway for  
726 inference of large phylogenetic trees. *Proceedings of the Gateway Computing Environments  
727 Workshop (GCE)*, New Orleans, Louisiana, 14 November 2010.

- 728  
729 Mitchell, A., Mitter, C. & Regier, J.C. (2006) Systematics and evolution of the cutworm moths  
730 (Lepidoptera: Noctuidae): evidence from two protein-coding nuclear genes: molecular  
731 systematics of Noctuidae. *Systematic Entomology*, **31**, 21–46.  
732  
733 NCBI Resource Coordinators. (2017) Database resources of the National Center for  
734 Biotechnology Information. *Nucleic Acids Research*, **45**, D12–D17.  
735  
736 Nguyen, L.-T., Schmidt, H.A., von Haeseler, A. & Minh, B.Q. (2015) IQ-TREE: a fast and  
737 effective stochastic algorithm for estimating maximum-likelihood phylogenies. *Molecular*  
738 *Biology and Evolution*, **32**, 268–274.  
739  
740 Poole, R.W. (1989) *Lepidopterorum Catalogus (New Series). Fascicle 118. Noctuidae [in 3*  
741 *Parts]* E.J. Brill/Flora and Fauna Publications, New York, USA.  
742  
743 Poole, R.W. (1995) Noctuoidea. Noctuidae (part). Cuculliinae, Stiriinae, Psaphidinae (Part).  
744 *The Moths of America North of Mexico, Fascicle 26.1* (ed. by R. B. Dominick *et al.*). The  
745 Wedge Entomological Research Foundation, Washington, D.C., USA.  
746  
747 R Core Team. (2017) R: A language and environment for statistical computing. R Foundation for  
748 Statistical Computing, Vienna, Austria. <https://www.R-project.org/>.  
749  
750 R Studio Team. (2015) RStudio: Integrated Development for R. RStudio, Inc., Boston, MA  
751 <http://www.rstudio.com/>.  
752  
753 Rambaut, A., Suchard, M.A., Xie D. & Drummond, A.J. (2014) Tracer v1.6, Available from  
754 <http://tree.bio.ed.ac.uk/software/tracer/>.  
755  
756 Ratnasingham, S. & Hebert, P.D.N. (2007) BOLD: the barcode of life data system  
757 (www.barcodinglife.org). *Molecular Ecology Notes*, **7**, 355–364.  
758  
759 Regier, J.C., Mitter, C., Mitter, K., Cummings, M.P., Bazinet, A.L., Hallwachs, W., Janzen D.H.  
760 & Zwick, A. (2017) Further progress on the phylogeny of Noctuoidea (Insecta: Lepidoptera)  
761 using an expanded gene sample. *Systematic Entomology*, **42**, 82–93.  
762  
763 Ronquist, F., Teslenko, M., van der Mark, P. *et al.* (2012) MrBayes 3.2: efficient Bayesian  
764 phylogenetic inference and model choice across a large model space. *Systematic Biology*,  
765 **61**, 539–542.  
766  
767 Rota, J., Zacharczenko, B.V., Wahlberg, N., Zahiri, R., Schmidt, B.C. & Wagner, D.L. (2016)  
768 Phylogenetic relationships of Acronictinae with discussion of the abdominal courtship brush  
769 in Noctuidae (Lepidoptera). *Systematic Entomology*, **41**, 416–429.  
770  
771 Stamatakis, A., Hoover, P., Rougemont, J. & Renner, S. (2008) A rapid bootstrap algorithm for  
772 the RAxML web servers. *Systematic Biology*, **57**, 758–771.  
773



- 774 Todd, E.L., Blanchard, A. & Poole, R.W. (1984) A revision of the genus *Aleptina* (Lepidoptera:  
775 Noctuidae). *Proceedings of the Entomological Society of Washington*, **86**, 951–960.  
776
- 777 Trifinopoulos, J. & Minh, B. (2018) IQ-TREE Manual: Frequently Asked Questions. Available  
778 from <http://www.iqtree.org/doc/Frequently-Asked-Questions>. Accessed 18 July 2018.  
779
- 780 Troubridge, J.T. (2008) A generic realignment of the Oncocnemidini sensu Hodges (1983)  
781 (Lepidoptera: Noctuidae: Oncocnemidinae), with descriptions of a new genus and 50 new  
782 species. *Zootaxa*, **1903**, 1–95.  
783
- 784 Van de Peer, Y., Baldauf, S.L., Doolittle, W.F. & Meyer, A. (2000) An updated and  
785 comprehensive rRNA phylogeny of (crown) eukaryotes based on rate-calibrated evolutionary  
786 distances. *Journal of Molecular Evolution*, **51**, 565–576.  
787
- 788 Wagner, D.L., McFarland, N., Lafontaine, J.D. & Connolly, B. (2008) Early stages of  
789 *Miracivira brillians* (Barnes) and reassignment of the genus to the Amphipyrinae: Psaphidini:  
790 Feraliina (Noctuidae). *Journal of the Lepidopterists' Society*, **62**, 121–132.  
791
- 792 Wagner, D.L., Schweitzer, D.F., Sullivan, J.B. & Reardon, R.C. (2011) *Owlet Caterpillars of*  
793 *Eastern North America*. Princeton University Press, Princeton, New Jersey, USA.  
794
- 795 Wahlberg, N. & Wheat, C.W. (2008) Genomic outposts serve the phylogenomic pioneers:  
796 designing novel nuclear markers for genomic DNA extractions of Lepidoptera. *Systematic*  
797 *Biology*, **57**, 231–242.  
798
- 799 Wahlberg, N., Wheat, C.W. & Peña, C. (2013) Timing and patterns in the taxonomic  
800 diversification of Lepidoptera (butterflies and moths). *PLoS ONE*, **8**, e80875.  
801
- 802 Yu, G., Smith, D.K., Zhu, H., Guan, Y. & Lam, T.T.Y. (2017) ggtree: an R package for  
803 visualization and annotation of phylogenetic trees with their covariates and other associated  
804 data. *Methods in Ecology and Evolution*, **8**, 28–36.  
805
- 806 Zahiri, R., Kitching, I.J., Lafontaine, J.D., Mutanen, M., Kaila, L., Holloway, J.D. & Wahlberg,  
807 N. (2011) A new molecular phylogeny offers hope for a stable family level classification of  
808 the Noctuoidea (Lepidoptera). *Zoologica Scripta*, **40**, 158–173.  
809
- 810 Zahiri, R., Holloway, J.D., Kitching, I.J., Lafontaine, J.D., Mutanen, M. & Wahlberg, N. (2012)  
811 Molecular phylogenetics of Erebidae (Lepidoptera, Noctuoidea). *Systematic Entomology*, **37**,  
812 102–124.  
813
- 814 Zahiri, R., Lafontaine, J.D., Schmidt, C., Holloway, J.D., Kitching, I.J., Mutanen, M. & Wahlberg,  
815 N. (2013) Relationships among the basal lineages of Noctuidae (Lepidoptera, Noctuoidea)  
816 based on eight gene regions. *Zoologica Scripta*, **42**, 488–507.  
817
- 818 Zhang, B.C. (1994) *Index of Economically Important Lepidoptera*. CAB International,  
819 Wallingford, UK.  
820

821

822 **Table 1.** Recommended taxonomic changes for taxa formerly regarded to be amphipyrids

823 according to Lafontaine & Schmidt (2010, 2015).

824

| <b>Taxon</b>                            | <b>Current Membership</b> | <b>Recommended Change</b>       |
|-----------------------------------------|---------------------------|---------------------------------|
| <i>Acopa</i> Harvey                     | Amphipyridae (Psaphidini) | Bryophilinae                    |
| <i>Aleptina</i> Dyar                    | Amphipyridae (Psaphidini) | Condicinae                      |
| Annaphilina                             | Amphipyridae (Stiriini)   | Stiriinae (Annaphilini)         |
| <i>Azenia</i> Grote                     | Amphipyridae (Azeniina)   | Noctuidae <i>incertae sedis</i> |
| Azeniina                                | Amphipyridae (Stiriini)   | Noctuidae <i>incertae sedis</i> |
| <i>Chamaeclea</i> Grote                 | Amphipyridae (Stiriini)   | Acontiinae (Chamaecleini)       |
| <i>Cropia</i> Walker                    | Amphipyridae (Psaphidini) | Noctuidae <i>incertae sedis</i> |
| Grotellina                              | Amphipyridae (Stiriini)   | Grotellinae                     |
| <i>Hemigrotella</i> Barnes & McDunnough | Amphipyridae (Stiriini)   | Amphipyridae (Psaphidini)       |
| <i>Heminocloa</i> Barnes & Benjamin     | Amphipyridae (Stiriini)   | Acontiinae (Chamaecleini)       |
| <i>Hemioslaria</i> Barnes & Benjamin    | Amphipyridae (Stiriini)   | Acontiinae (Chamaecleini)       |
| <i>Leucocnemis</i> Hampson              | Amphipyridae (Psaphidini) | Oncocnemidinae                  |
| <i>Nacopa</i> Barnes & McDunnough       | Amphipyridae (Psaphidini) | Noctuidae                       |
| <i>Narthecophora</i> Smith              | Amphipyridae (Azeniina)   | Stiriinae (Stiriini)            |
| <i>Oxycnemis gracillinea</i> (Grote)    | Amphipyridae (Psaphidini) | Oncocnemidinae                  |
| <i>Metaponpneumata</i> Möschler         | Amphipyridae (Psaphidini) | Noctuidae <i>incertae sedis</i> |
| <i>Sexserrata</i> Barnes & Benjamin     | Amphipyridae (Psaphidini) | Noctuidae <i>incertae sedis</i> |
| Stiriina                                | Amphipyridae (Stiriini)   | Stiriinae                       |
| <i>Thurberiphaga</i> Dyar               | Amphipyridae (Stiriini)   | Acontiinae (Chamaecleini)       |
| <i>Tristyla</i> Smith                   | Amphipyridae (Azeniina)   | Noctuidae <i>incertae sedis</i> |

825

826

827

828

829

830

831

832

833

834

835

836



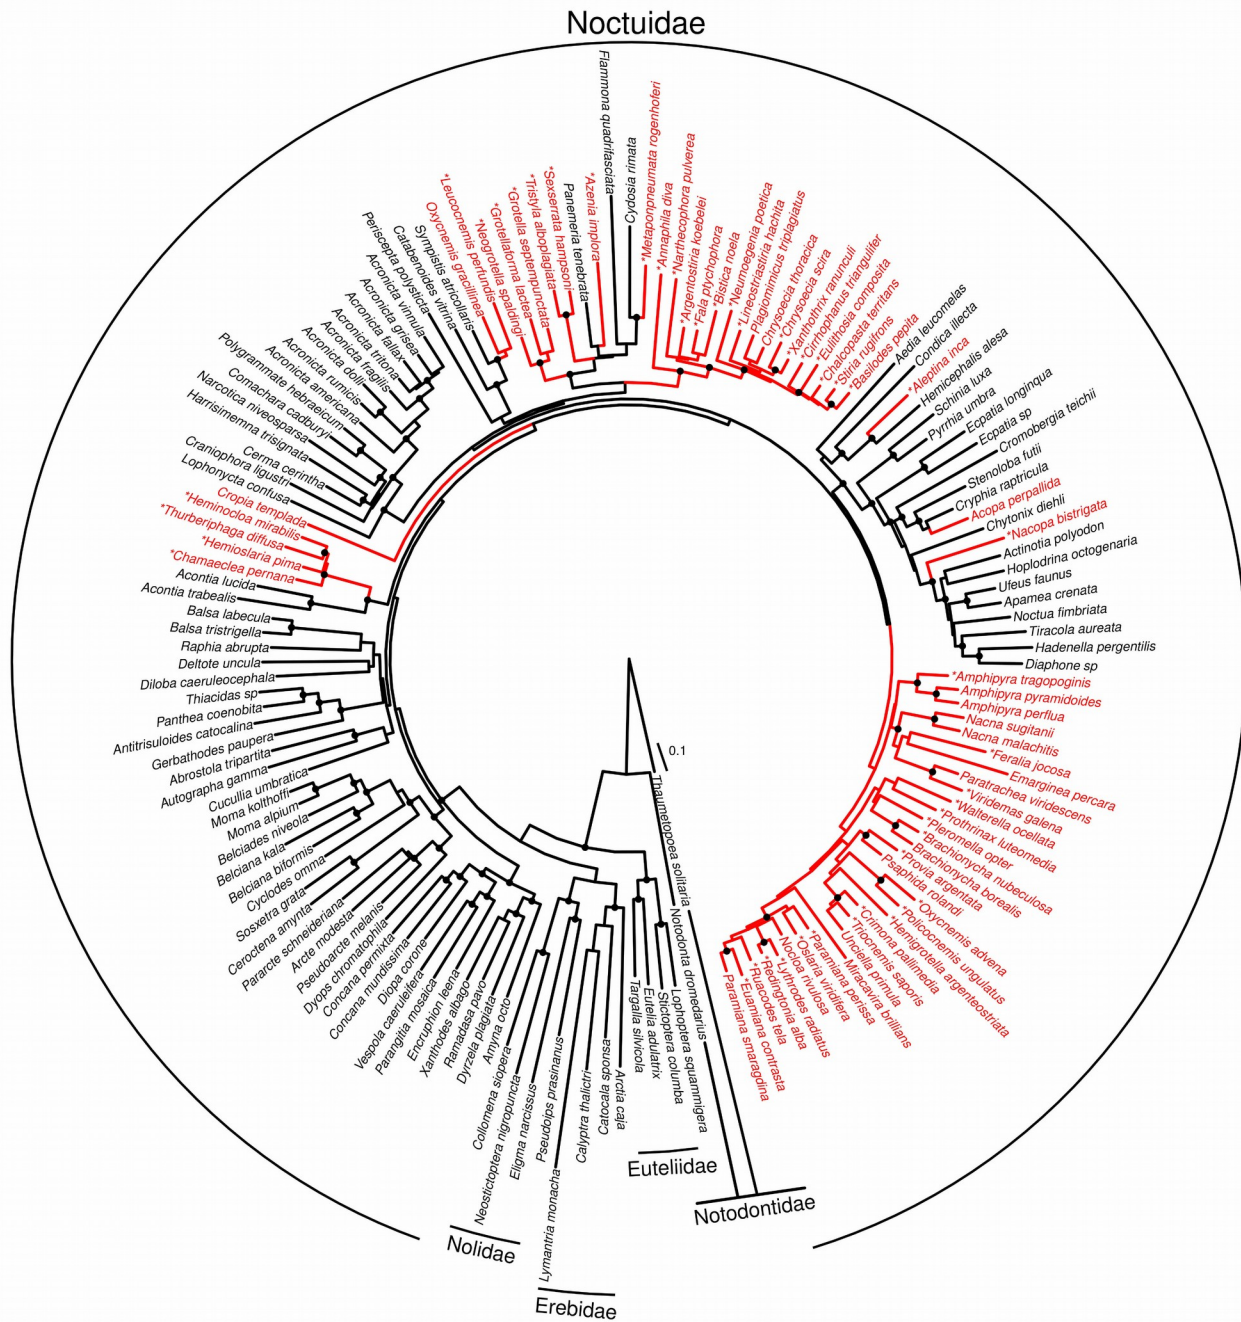

838 **Fig. 1.** Results of seven-gene RAxML analysis. All Noctuoidea lineages in the dataset are shown.  
 839 Lineages colored in red are classified as Amphipyrinae according to Lafontaine and Schmidt  
 840 (2010, 2015). Scale bar shows expected substitutions per site. Nodes with bootstrap  $\geq 70$  are  
 841 shown as black dots (see Methods for bootstrap details). Type species for amphipyrine genera are  
 842 denoted with an asterisk.  
 843

844

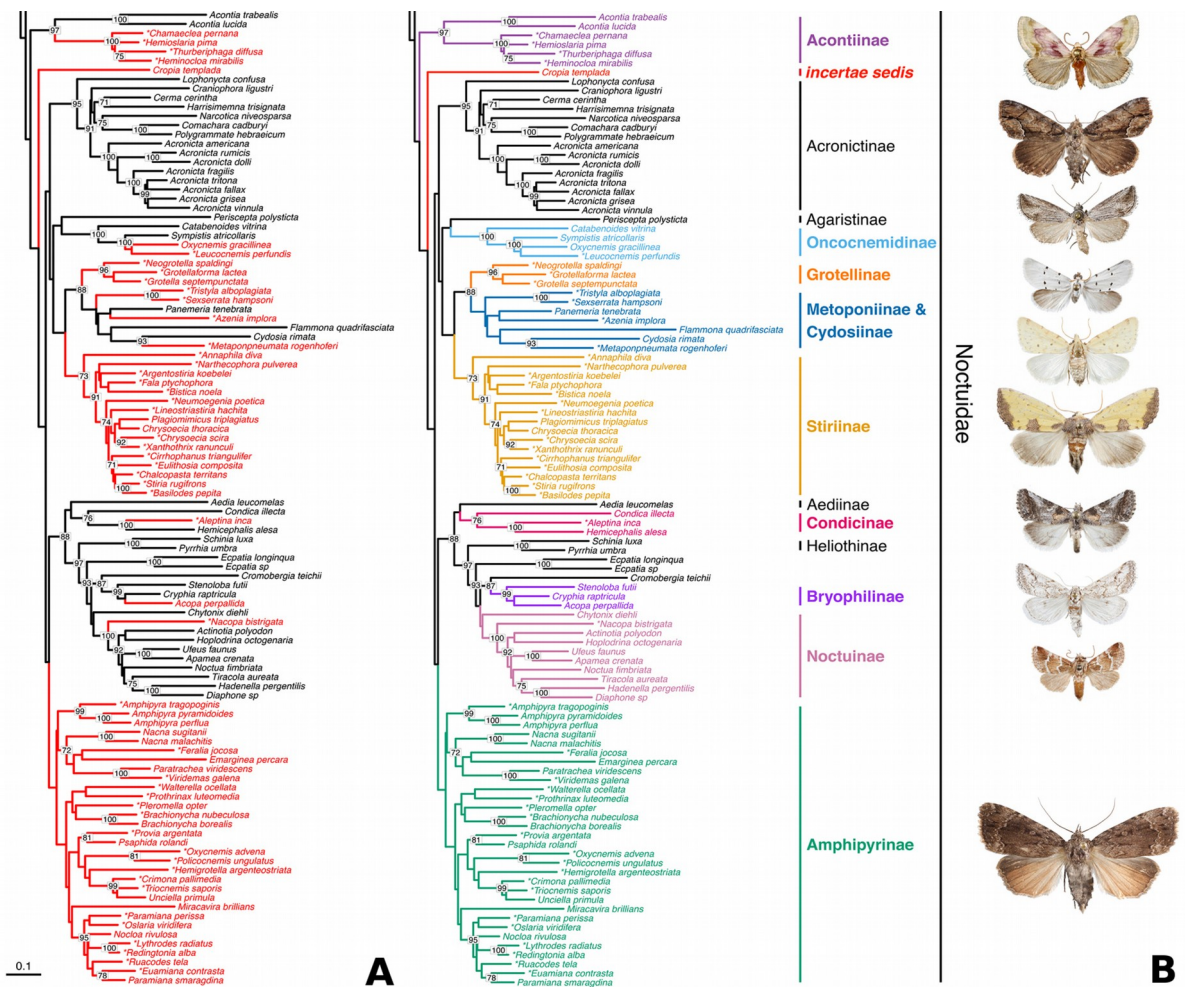

846 **Figs 2A,B.** A, Results of seven-gene RAxML analysis: only the extent of the tree containing  
 847 Amphipyrinae (sensu Lafontaine and Schmidt, 2010, 2015) lineages shown. Lineages colored in  
 848 red are classified as Amphipyrinae. Bootstrap values  $\geq 70$  are displayed (see Methods for  
 849 bootstrap details). Type species for amphipyrine genera denoted with an asterisk. B, Same  
 850 analysis as in Fig 2A but with subfamily-level taxa that contain amphipyrine taxa (sensu  
 851 Lafontaine and Schmidt, 2010, 2015) colored and labeled in bold. For each of the subfamily-  
 852 level taxa that contain amphipyridines, a representative species used in the analysis is pictured near  
 853 its position in the tree. From top to bottom: *Chamaeclelea pernana* (Grote), *Cropia connecta*  
 854 (Smith), *Oxycnemis gracillinea* (Grote), *Grotella septempunctata* Harvey, *Azenia implora* Grote,  
 855 *Stiria rugifrons* Grote, *Aleptina inca* Dyar, *Acopa perpallida* Grote, *Nacopa bistrigata* (Barnes &  
 856 McDunnough), *Amphipyra pyramidoides* Gueneé. Images are (roughly) scaled to life size.

857  
 858  
 859  
 860  
 861  
 862  
 863



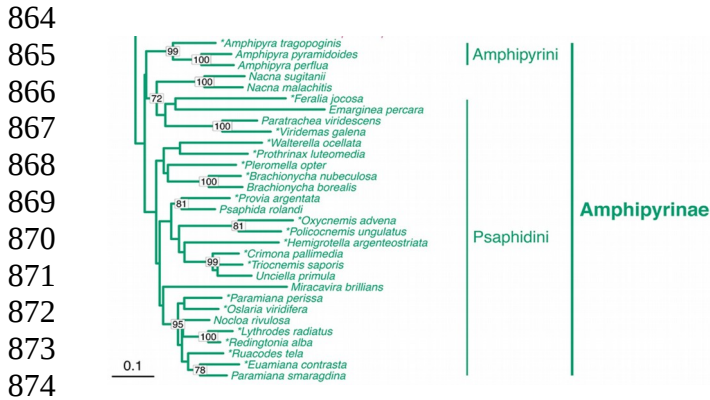

875 **Fig. 3.** Subset of Fig 2B showing just  
876 Amphipyrinae s.s. with tribes (Amphipyryini and  
877 *Psaphidini*) labeled. *Nacna* Fletcher is not treated  
878 by Lafontaine and Schmidt (2010, 2015).

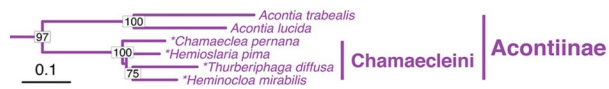

883 **Fig. 5.** Subset of Fig 2B showing Acontiinae  
884 with tribe Chamaecleini.

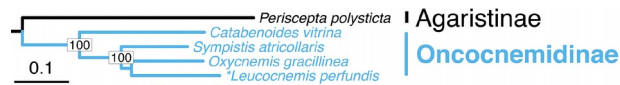

891 **Fig. 7.** Subset of Fig 2B showing Agaristinae  
892 and Oncocnemidinae.

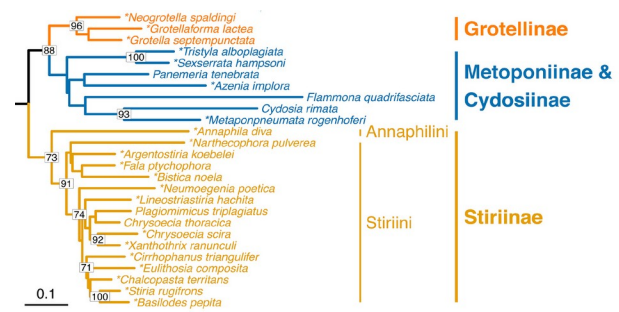

905 **Fig. 4.** Subset of Fig 2B showing Grotellinae,  
906 Metoponiinae, Cydosiinae, and Stiriinae.

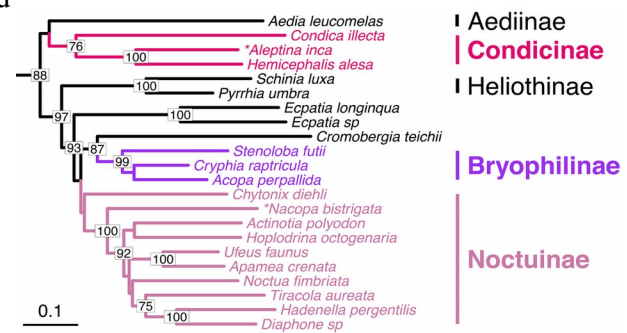

921 **Fig. 6.** Subset of Fig 2B showing Aediinae,  
922 Condicinae, Heliiothinae, Bryophilinae, and  
923 Noctuinae. The genera *Ecpatia* Turner and  
924 *Cromobergia* Bourquin are unassigned to  
925 subfamily.

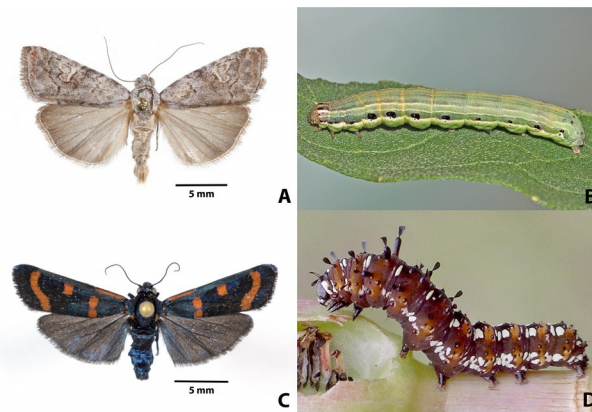

945 **Figs 8A-D.** Adults and larvae of *Cydosia* and *Metaponpneumata*. A, *Metaponpneumata*  
946 *rogenhoferi* Möschler adult. B, *M. rogenhoferi* last instar. C, *Cydosia aurivitta* Grote & Robinson  
947 adult. D, *C. aurivitta* last instar. (*Cydosia* larval image courtesy of Valerie Bugh.)
